# Supplementary material for: Highly Sensitive and Multiplexed In-Situ Protein Profiling with Cleavable Fluorescent Streptavidin
Source: MDPI journal article supplement (doi:10.3390/cells9040852), 2020-04-01
Supplement: s1 [file s1]

## Supplementary Materials

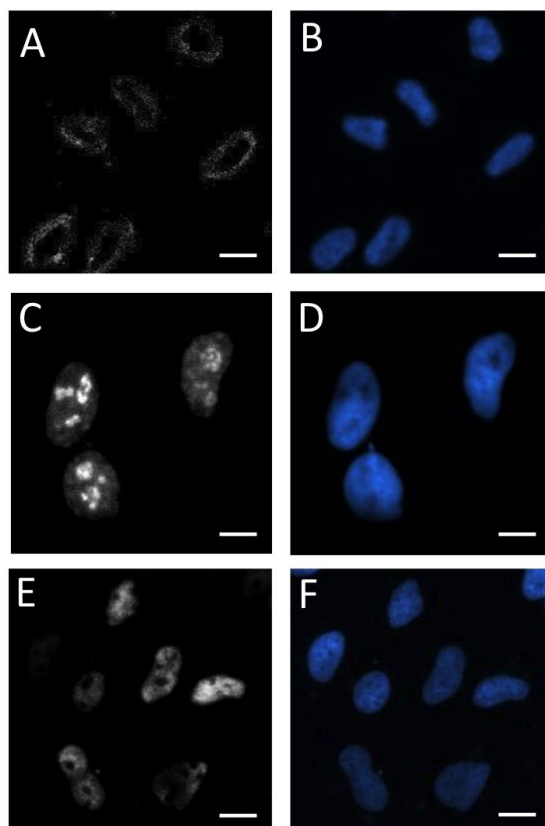

**Figure S1.** Fluorescent images obtained by conventional immunofluorescence. (A) Fluorescent image of protein c-erbB-2 in HeLa cells by conventional immunofluorescence and (B) the corresponding DAPI staining of nuclei. (C) Fluorescent image of protein Ki67 in HeLa cells by conventional immunofluorescence and (D) the corresponding DAPI staining of nuclei. (E) Fluorescent image of protein H4K20me in HeLa cells by conventional immunofluorescence and (F) the corresponding DAPI staining of nuclei. Scale bars, 20  $\mu\text{m}$ .

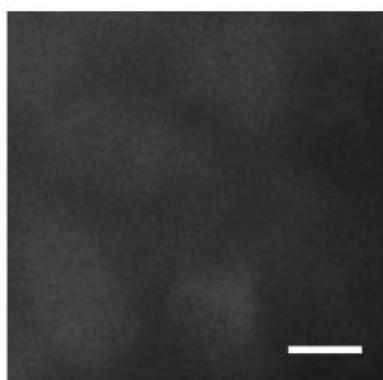

**Figure S2.** Fluorescent image of protein c-erbB-2 stained in the third analysis cycle without signal amplification. Scale bar, 20  $\mu\text{m}$ .
